**The Chinese soft-shelled turtle, *Pelodiscus sinensis*, decreases nitrogenous excretion,  
reduces urea synthesis and suppresses ammonia production during emersion**

Yuen K. Ip<sup>1\*</sup>, Serene M. L. Lee<sup>1</sup>, Wai P. Wong<sup>1</sup> and Shit F. Chew<sup>2</sup>

<sup>1</sup>*Department of Biological Science, National University of Singapore, Kent Ridge, Singapore*

*117543, Republic of Singapore,*

<sup>2</sup>*Natural Sciences and Science Education, National Institute of Education, Nanyang*

*Technological University, 1 Nanyang Walk, Singapore 637616, Republic of Singapore.*

\*author for correspondence

Running head: Emersion and nitrogen metabolism in *P. sinensis*

---

Correspondence address:

Dr. Y. K. Ip  
Professor  
Department of Biological Sciences  
National University of Singapore  
Kent Ridge  
Singapore 117543  
Republic of Singapore

Phone: (65)-6516-2702

Fax: (65)-6779-2486

Email: [dbsipyk@nus.edu.sg](mailto:dbsipyk@nus.edu.sg)

## Summary

The objective of this study was to examine the effects of 6 days of emersion on nitrogen metabolism and excretion in the Chinese soft-shelled turtle, *Pelodiscus sinensis*. Despite having a soft shell with a cutaneous surface which is known to be water permeable, *P. sinensis* lost only ~2% of body mass and was able to maintain its hematocrit and plasma osmolality,  $[Na^+]$  and  $[Cl^-]$  during 6 days of emersion. During emersion, it ameliorated water loss by reducing urine output, which led to a reduction (by 29-76%) in ammonia excretion. In comparison, there was a more prominent reduction (by 82-99%) in urea excretion during emersion due to a lack of water to flush the buccopharyngeal epithelium, which is known to be the major route of urea excretion. Consequently, emersion resulted in an apparent shift from ureotelic to ammonotelic in *P. sinensis*. Although urea concentration increased in several tissues, the excess urea accumulated could only account for 13-22% of the deficit in urea excretion. Hence, it can be concluded that a decrease (~80%) in urea synthesis occurred in *P. sinensis* during 6 days of emersion. Indeed, emersion led to significant decreases in activities of some ornithine-urea cycle enzymes (argininosuccinate synthetase/argininosuccinate lyase and arginase) from the liver of *P. sinensis*. Since a decrease in urea synthesis occurred without accumulations of ammonia and total free amino acids, it can be deduced that ammonia production through amino acid catabolism was suppressed with a proportional reduction in proteolysis in *P. sinensis* during emersion. Indeed, calculated results revealed that there could be a prominent decrease (~88%) in ammonia production in turtles after 6 days of emersion. In summary, despite being ureogenic and ureotelic in water, *P. sinensis* adopted reduction in ammonia production, instead of increased urea synthesis, as the major strategy to ameliorate ammonia toxicity and problems associated with dehydration during terrestrial exposure.

**Key words:** amino acids, ammonia, emersion, nitrogen wastes excretion, nitrogen metabolism, urea

## Introduction

The Chinese soft-shelled turtle, *Pelodiscus sinensis* Wiegmann 1835, previously known as *Trionyx sinensis*, is a member of the Family Trionychidae. It inhabits standing or slow-flowing bodies of water, such as ponds, reservoirs and rivers, in Eastern Asia. Unlike other chelonids, it has a flat carapace, which is devoid of the usual horny laminae. Since it is covered with soft, leathery skin, it has the ability to employ cutaneous respiration in addition to buccopharyngeal respiration under water during forced submergence (Wang et al., 1989). It may be partially or completely exposed to air when the ponds or creeks dry up during hot spells or when it emerges from waters to bask. *Pelodiscus sinensis* is ureogenic and possesses a full complement of ornithine-urea cycle (OUC) enzymes in its liver (Lee et al., 2006, 2007). It is primarily ureotelic, excreting the majority (71%) of the waste-nitrogen (N) as urea-N in freshwater. Unlike other reptiles, it excretes urea predominantly through the mouth instead of the kidney during immersion (Ip et al., 2012). When restrained on land, *P. sinensis* occasionally submerges its head into water, during which urea excretion and O<sub>2</sub> uptake occur simultaneously. Its buccopharyngeal epithelium is capable of active urea excretion, and expresses a putative urea transporter (*UT-A2*) which is absent from the kidney (Ip et al., 2012).

Buccopharyngeal urea excretion might have facilitated *P. sinensis* (Ip et al., 2012) and other members of Trionychidae (Minnich, 1979) to invade the brackish or marine environment. When exposed to brackish water (salinity 15), significant increases in plasma osmolality, [Na<sup>+</sup>], [Cl<sup>-</sup>] and [urea], which presumably decrease the osmotic loss of water, occur in *P. sinensis* (Lee et al., 2006). Simultaneously, there are significant increases in concentrations of urea, certain free amino acids (FAAs) and water-soluble proteins in various tissues, presumably for cell volume regulation. Proteolysis is apparently enhanced to release FAAs which act as osmolytes (Lee et al., 2006). Catabolism of certain amino acids is also enhanced to release ammonia for increased urea synthesis. Since the estimated rate of urea

synthesis in unfed animals demanded only ~1.5% of the maximal capacity of carbamoyl phosphate synthetase I (CPS I) in the liver, Lee et al. (2007) postulated that *P. sinensis* would have a prominent potential for increased urea synthesis when confronted with ammonia toxicity after feeding or during emersion. Indeed, the rate of urea synthesis increases 7-fold during 24 h post-feeding, which effectively prevented any postprandial surge in plasma and tissue ammonia concentrations (Lee et al., 2006). However, to date, no information is available on the effects of emersion on excretory nitrogen metabolism in *P. sinensis*.

Bentley and Schmidt-Nielsen (1970) reported that, in air, the total evaporative water loss through the cutaneous surface of the soft-shelled turtle *Apalone spinifera* (previously *Trionyx spinifer*;  $48.0 \pm 4.8 \text{ mg cm}^{-2} \text{ day}^{-1}$ ) was three times greater than that of the pond slider *Trachemys scripta* (previously *Pseudemys scripta*;  $15.8 \pm 1.7 \text{ mg cm}^{-2} \text{ day}^{-1}$ ). They, therefore, concluded that cutaneous water loss in *A. spinifera* approached those of some aquatic amphibians (e.g. *Necturus*; Bentley and Schmidt-Nielsen, 1970). Since *P. sinensis*, similar to *A. spinifera*, does not possess a horny carapace, it would probably experience more severe dehydration stress than hard-shelled turtles during emersion. Furthermore, since soft-shelled turtles are incapable of producing hyperosmotic urine (Shoemaker and Nagy, 1977) or salt gland secretion (Minnich, 1979; Shoemaker and Nagy, 1977), severe water loss through dehydration would theoretically lead to increases in plasma ionic concentrations. Hence, the first objective of this study was to determine whether 6 days of emersion would result in increases in plasma osmolality,  $[\text{Na}^+]$  and  $[\text{Cl}^-]$  in *P. sinensis*. The hypothesis tested was that *P. sinensis* could effectively conserve water through a reduction in urine production during this period. Since reduced urine production could theoretically impede waste-N excretion, the second objective of this study was to determine whether 6 days of emersion would result in decreases in rates of ammonia and/or urea excretion. We hypothesized that the normal ammonia excretion rate would be maintained during emersion because ammonia could be excreted through the highly vascularized ventral carapace which was in constant

contact with a film of water during emersion. Since *P. sinensis* excreted urea mainly through the buccopharyngeal cavity (Ip et al., 2012), and since no water was available to rinse the mouth during emersion, we further hypothesized that emersion would lead to a greater reduction in urea excretion than ammonia excretion.

Traditionally, studies on ammonia defense in animals focused on the detoxification of ammonia to less toxic compounds like urea, uric acid and/or glutamine (Campbell, 1973, 1991, 1995). Since *P. sinensis* is ureogenic, the third objective of this study was to examine whether urea accumulation and increased urea synthesis would occur in *P. sinensis* during 6 days of emersion. Since ammonia production can be suppressed through a reduction in amino acid catabolism (Jow et al., 1999; Lim et al., 2001, Ip et al., 2001a; Chew et al., 2001, 2003b, 2004; Tay et al., 2003; Walsh et al., 2004; Loong et al., 2005; Ip et al., 2005b, c) or through the partial catabolism of certain amino acids to alanine (Ip et al., 2001c; Chew et al., 2001, 2003a), reduction in ammonia production can be an important adaptation to ameliorate ammonia toxicity in some aquatic animals during emersion (Ip et al., 2001b, 2004; Chew et al., 2005). Therefore, the fourth objective of this study was to examine changes in tissues ammonia and FAA concentrations in *P. sinensis* during 6 days of emersion, and to evaluate indirectly whether a reduction in amino acid catabolism and/or protein degradation would have occurred. We hypothesized that *P. sinensis* could effectively reduce ammonia production during emersion, which would manifest as a deficit between decreases in excretion of nitrogenous waste and increases in accumulation of nitrogenous compounds. If indeed a profound suppression of ammonia production occurred after 6 days of emersion, we speculated that there would be a reduction in the rate of urea synthesis and perhaps even decreases in activities of some OUC enzymes in the liver of *P. sinensis* exposed to terrestrial conditions, which is contrary to the traditional notion that ureogenic aquatic animals would always increase urea synthesis in response to emersion.

## Materials and Methods

### *Animals*

Specimens of *P. sinensis* (200–400 g body mass) were purchased from a turtle farm in Malaysia and transferred to the National University of Singapore. They were maintained in plastic aquaria in freshwater (salinity 1) at 25°C in the laboratory, and water was changed daily. Salinity was monitored using a YSI Model 30/10 FT salinometer (Yellow Springs Instrument Co. Inc, Ohio, USA). No attempt was made to separate the sexes. The turtles were acclimated to laboratory conditions for at least a week. During the acclimation period, they were fed prawn meat. Food was withdrawn 5 days prior to experiments so that urine could be collected without contamination with fecal materials. Since fasting would naturally affect excretory nitrogen metabolism, it was essential to have parallel controls (kept in water) to compare with the experimental turtles (exposed to terrestrial conditions) at specific time points during the 6-day period. All experiments were performed under a 12 h:12 h dark:light regime. Procedures adopted in this study were approved by the Institutional Animal Care and Use Committee of the National University of Singapore (IACUC 033/12).

### ***Exposure of *P. sinensis* to terrestrial conditions, collection of water and urine samples and determination of urine volume***

Masses of individual turtles were recorded with a Shimadzu animal balance (Shimadzu Co., Kyoto, Japan) to the nearest 0.1 g. Following the procedure of Ip et al. (2012), a flexible latex tubing (length 18 cm, radius 0.7 cm) was attached externally around the tail anterior to the cloaca of *P. sinensis* using 3M Vetbond™ tissue adhesive. An opening made at the very tip of the tube was held closed by a dialysis clip. Turtles immersed in 10 volumes (w/v) of freshwater (salinity 1) were regarded as controls. Experimental turtles were exposed to terrestrial conditions at 25°C in plastic aquaria tanks (L44 cm x W29 cm x H11 cm) for 6 days with 50 ml of freshwater (salinity 1) which formed a thin film (<0.4 mm in

depth) at the bottom. Under such conditions, turtle's body, except perhaps the skin of the ventral carapace, was completely exposed to air and no part of the body was immersed in water. The average relative humidity of the room in which animals were kept was 84%. Water samples (3 ml) were collected daily and acidified with 70  $\mu\text{l}$  of 1 mol  $\text{l}^{-1}$  HCl to retain  $\text{NH}_4^+$ , and kept at 4°C until analysis for ammonia and urea which were performed within 48 h. Urine was collected daily by emptying the contents of the tubing through the opening into a 5 or 10 ml measuring cylinder. Deionized water was introduced into the tubing through the opening to rinse the inside surface before resealing with the dialysis clip. Urine samples were acidified with 1 mol  $\text{l}^{-1}$  HCl, with the ratio of acid to urine being 7: 300, and kept at 4°C until analysis. Analysis was performed within 48 h, and preliminary analysis confirmed that no degradation of urea and no loss of ammonia occurred during the 2-day period.

#### ***Exposure of *P. sinensis* to terrestrial conditions and collection of water and tissue samples***

Turtles were exposed to the control and terrestrial conditions as mentioned above. Both control and experimental turtles could urinate into the container at liberty. Masses of individual turtles were recorded during the 6 days of immersion and 6 days of emersion. Water samples (3 ml) were collected daily and acidified as mentioned previously, and kept at 4°C until analysis for ammonia and urea.

On days 3 and 6, turtles were killed by a strong blow to the head. The muscle, liver, and brain were quickly excised. The excised tissue and organ samples (<1 g) were immediately freeze-clamped in liquid nitrogen with pre-cooled tongs (Faupel et al., 1972). Frozen samples were kept at -80°C until analysis.

Blood was obtained by cardiac puncture. Hematocrit was determined by collecting blood in heparinized capillary tubes which were centrifuged at 3000 rpm for 7 min. The hematocrit was expressed as percent packed cell volume against the total volume of blood. In addition, blood samples were collected into heparinized syringes, and centrifuged at 5000 g and 4°C for 5 min to obtain the plasma. A portion of the plasma was used for analyses of

osmolality and concentrations of  $\text{Na}^+$  and  $\text{Cl}^-$ . The rest of the plasma was deproteinized by the addition of an equal volume (v/v) of ice-cold 6% trichloroacetic acid (TCA) and centrifuged at 10000 g and 4°C for 15 min. The resulting supernatant was kept at -25°C until analysis.

The frozen samples were weighed, ground to a powder in liquid nitrogen, and homogenized three times in 5 volumes (w/v) of ice-cold 6% TCA at 24000 rpm for 20 s each using an Ultra-Turrax homogenizer (Janke and Kundel, Stanfeni, Germany) with intervals of 10 s between each homogenization. The homogenate was centrifuged at 10000 g and 4°C for 30 min, and the supernatant obtained was kept at -25°C until analysis.

#### ***Determination of ammonia and urea concentrations in water and urine samples***

Ammonia and urea concentrations in water and urine samples were determined as described by Koops et al. (1975) and Jow et al. (1999), respectively. The pH of the sample was adjusted to 6.0-6.5 with 1 mol  $\text{l}^{-1}$  KOH. Two reagents were involved in the colorimetric ammonia assay. Reagent A contained 1.44 mol  $\text{l}^{-1}$  NaCl and 5.5 mol  $\text{l}^{-1}$  sodium nitroprusside, while Reagent B contained 0.031 mol  $\text{l}^{-1}$  sodium dichloroisocyanate and 2.7 mol  $\text{l}^{-1}$  KOH. To 1 ml of the neutralized sample, 0.1 ml of Reagent A was added rapidly followed by 0.1 ml of Reagent B with immediate mixing. The reaction mixture was incubated at 25°C for 30 min and the absorbance recorded at 660 nm.  $\text{NH}_4\text{Cl}$  obtained from Merck Chemical Co. was used as a standard for comparison. Urea was analyzed colorimetrically by the addition of 0.2 ml of water followed with 0.5 ml of a 2:1 mixture of Reagent A, containing 0.6 mmol  $\text{l}^{-1}$   $\text{FeCl}_3$  in 8.5%  $\text{H}_3\text{PO}_4$  and 30%  $\text{KH}_2\text{PO}_4$ , and Reagent B, containing 247 mmol  $\text{l}^{-1}$  2,3-butandionemonoxime and 5 mmol  $\text{l}^{-1}$  thiosemicarbazide, to 0.2 ml of neutralized sample. The mixture was incubated at 100°C for 10 min. After cooling on ice, the absorbance was recorded at 525 nm. To another 0.2 ml of the same sample, urea assay was performed after incubation with 0.2 ml of 20 mmol  $\text{l}^{-1}$  imidazole buffer (pH 7.2) containing 2 IU urease for 15 min at 30°C but without the addition of 0.2 ml water. The difference in absorbance between



the samples with and without urease treatment was used to calculate for the urea concentration. Urea obtained from Sigma Chemical Co. was used as a standard for comparison. The rates of ammonia or urea excretion were expressed as  $\mu\text{mol N day}^{-1} \text{g}^{-1}$  turtle.

#### ***Determination of plasma osmolality and concentrations of $\text{Na}^+$ and $\text{Cl}^-$***

Plasma osmolality was analyzed using a Wescor 5500 vapour pressure osmometer (Wescor, UT, USA). Concentrations of  $\text{Na}^+$  and  $\text{Cl}^-$  were determined by a Corning 410 flame photometer, and a Corning 925 chloride analyzer, respectively (Corning, Halstead, UK).

#### ***Determination of activities of OUC enzymes, glutamine synthetase and glutamate dehydrogenase***

Preliminary results indicated that OUC enzymes were present only in the liver of *P. sinensis*. The liver was excised quickly and homogenized three times (20 s each with 10 s intervals) in 5 volumes (w/v) of ice-cold extraction buffer containing 50  $\text{mmol l}^{-1}$  Hepes (pH 7.6), 50  $\text{mmol l}^{-1}$  KCl, 0.5  $\text{mmol l}^{-1}$  EDTA, 1  $\text{mmol l}^{-1}$  dithiothreitol and 0.5  $\text{mmol l}^{-1}$  phenylmethylsulfonyl fluoride (PMSF) using an Ultra-Turrax homogenizer. The homogenate was sonicated (110 W, 20 kHz; Misonix Incorporated, Farmingdale, NY, USA) three times for 20 s each, with a 10 s break between each sonication. The sonicated sample was centrifuged at 10000 g and 4°C for 15 min. After centrifugation, the supernatant was passed through a Bio-Rad P-6DG column (Bio-Rad Laboratories, Hercules, CA, USA) equilibrated with the extraction buffer without EDTA and PMSF. The filtrate obtained was used directly for enzyme assays. Activities of CPS, ornithine transcarbamylase (OTC), argininosuccinate synthetase together with argininosuccinate lyase (ASS + ASL), arginase and glutamine synthetase (GS) were determined as described previously by Lee et al. (2006). Glutamate dehydrogenase activity in the amination direction was assayed according to Ip et al. (1993). Enzyme activities were expressed as  $\mu\text{mol}$  of substrate used or product formed  $\text{min}^{-1} \text{g}^{-1}$  tissue.

### ***Determination of contents of ammonia, urea and FAAs in tissue samples***

The pH of the deproteinized sample was adjusted to between 6.0 and 6.5 with 2 mol l<sup>-1</sup> KHCO<sub>3</sub>. The ammonia and urea contents were determined using the method of Bergmeyer and Beutler (1985) and Jow et al. (1999), respectively. For FAAs analysis, the supernatant obtained was adjusted to pH 2.2 with 4 mol l<sup>-1</sup> lithium hydroxide and diluted appropriately with 0.2 mol l<sup>-1</sup> lithium citrate buffer (pH 2.2). FAAs were analyzed using a Shimadzu LC-10 A amino acid analysis system (Shimadzu, Kyoto, Japan) with a Shim-pack ISC-07/S1504 Li-type column. Despite a complete FAA analysis being performed for each sample, only contents of alanine, glutamate, glutamine, total FAA (TFAA) and total essential FAA (TEFAA) were presented in this report. The content of TFAA was calculated by the summation of contents of all FAAs, and that of TEFAA was calculated as the sum of histidine, isoleucine, leucine, lysine, methionine, phenylalanine, threonine, tryptophan and valine. Results were expressed as μmol g<sup>-1</sup> tissue or μmol ml<sup>-1</sup> plasma.

### ***Statistical analyses***

Results are presented as means ± standard error of the mean (s.e.m.). Results in Fig. 1 were analyzed using 2-way repeated-measures ANOVA followed by least-square means (LSMEANS) to evaluate differences between means using SAS/STAT. Arcsine transformation was applied to all percentage data before statistical analysis. Results in all other tables and figures, and those for hematocrit, masses, [Na<sup>+</sup>] and [Cl<sup>-</sup>] were evaluated using independent t-tests. Differences with P<0.05 were regarded as statistically significant.

## Results

### *Body mass, hematocrit, plasma osmolality, plasma [Na<sup>+</sup>] and [Cl<sup>-</sup>]*

After 3 and 6 days of emersion, the body mass of *P. sinensis* ( $N=5$ ) decreased by  $2.0 \pm 0.2\%$  and  $2.3 \pm 0.5\%$ , respectively. However, the hematocrit value for turtles exposed to terrestrial conditions for 6 days ( $30 \pm 1\%$ ,  $N=5$ ) was not significantly different from that of the control immersed for 6 days ( $28 \pm 3\%$ ,  $N=4$ ). Similarly, the plasma osmolality,  $[Na^+]$  and  $[Cl^-]$  for turtles exposed to terrestrial conditions for 6 days ( $288 \pm 3$  mosmol  $kg^{-1}$ ,  $128 \pm 1$  mmol  $l^{-1}$  and  $77 \pm 4$  mmol  $l^{-1}$ , respectively,  $N=5$ ) were not significantly different from those of the control immersed for 6 days ( $285 \pm 2$  mosmol  $kg^{-1}$ ,  $129 \pm 2$  mmol  $l^{-1}$  and  $84 \pm 2$  mmol  $l^{-1}$  respectively,  $N=4$ ).

### *Ammonia and urea excretion rates during emersion with urine being collected from the container*

On day 1, the rates of ammonia (Fig. 1A) and urea-N (Fig. 1B) excretion in immersed turtles (control) were  $1.0$  and  $2.9$   $\mu\text{mol N day}^{-1} \text{g}^{-1}$ , respectively. So, *P. sinensis* immersed in water was primarily ureotelic, excreting approximately 74% of waste-N as urea-N. Surprisingly, turtles apparently switched from ureotelic to ammonotelic during emersion, and the percentage of waste-N excreted as urea-N decreased from 74% to 20% on day 1 and increased gradually to 47% by day 6 (Fig. 1C). This was a result of a much greater magnitude of decrease in the rate of urea excretion (decreased by 81-99%) compared to that of the rate of ammonia excretion (decreased by 34-77%) throughout the 6-day period.

### *Urine volume and rate of ammonia and urea excretion through the urine collected in latex tubing*

By collecting urine into a latex tubing, it was discovered that turtles immersed in water produced 7.3-16 ml of urine daily, but those undergoing 5 days of emersion had a daily

urine production of only 2.0-3.4 ml (Supplementary Table). On day 6, anuria occurred in 5 out of 6 turtles, with one turtle producing 6.7 ml of urine (Supplementary Table).

For control turtles immersed in water, the daily rates of ammonia excretion through the extra-renal and the renal routes are comparable; 31-80% of the ammonia-N excreted during the 6-day period originated from the urine (Table 1). In contrast, renal urea excretion could account for only 0.45-15% of the total urea excreted throughout the 6 days of immersion (Table 2). Emersion resulted in significant decreases in ammonia excretion through the extra-renal (days 1, 3 and 6) and the renal (days 2 and 4) routes (Table 1). It also resulted in a significant decrease in the rate of urea excretion through the extra-renal route on days 1, 2, 3, 4 and 6, but had no significant effects on the rate of renal urea excretion (Table 2).

#### *Effects of 6 days of emersion on hepatic OUC enzyme activities*

There were no significant changes in activities of OUC enzymes from the liver of turtles after 3 days of emersion. However, 6 days of emersion led to significantly decreases in activities of ASS + ASL and arginase by 36% and 28%, respectively (Table 3).

#### *Effects of emersion on tissue ammonia and urea contents*

There were no significant changes in the ammonia contents in muscle and liver throughout the 6 days of emersion, but the ammonia contents in plasma and brain increased significantly by 1.4- and 1.6-fold, respectively, on day 6 (Table 4). In contrast, there were significantly increases in urea contents in all these tissues and organs. On day 3, the urea contents in the brain, liver, muscle and plasma increased by 2.5-, 2.3-, 2.7-, 2.9-fold and level off thereafter (Table 4).

#### *Effects of emersion on tissue FAAs contents*

In general, 6 days of emersion had no significant effects on the contents of various FAAs, TFAA and TEFAA in the liver, muscle and plasma of *P. sinensis* (Table 5). However,

there was a significant increase in the glutamine content in the brain on days 3 (1.6-fold) and 6 (2.1-fold). On day 6, there was also a significant decrease in the content of TEFAA in the brain (Table 5).

***An estimate of the overall nitrogen balance for a 300 g *P. sinensis****

Based on results of Lee et al. (2006), masses (g) of the liver and muscle for a 300 g turtle were taken as 9.4 and 74, respectively. The plasma volume in a 300 g turtle was taken as 15 ml (Lee et al., 2006). The brain was not taken into the calculation due to its light mass. Of note, the carapace and the endoskeleton of a 300 g turtle weighed 150 g and 67 g, respectively, which implies that, similar to animals without a carapace, the liver and muscle together would constitute ~56% of the body mass excluding the carapace but inclusive of the endoskeleton. The construction of a balance sheet (Table 6) for the excretion and retention of N during emersion for a 300 g turtle reveals that emersion indeed resulted in a decrease in nitrogenous waste excretion. The reduction in N-waste excretion amounted to 2417 and 4395  $\mu\text{mol-N}$  on day 3 and day 6, respectively, but the respective excess N accumulated were only 395 and 472  $\mu\text{mol-N}$  (Table 6), which indicates the occurrence of a prominent reduction in ammonia production.

## Discussion

### *Osmotic stress of emersion*

In the past, the rates of evaporative water loss in turtles were determined in the laboratory under non-physiological conditions; the external surfaces of the animals were completely dried and dry air was flushed over animals during measurements (e.g., Bentley and Schmidt-Nielsen, 1970). In a more recent study, Peterson and Greenshields (2001) exposed *T. scripta* to 10 days of dehydration in a relative humidity of 40% at 25°C. At the end of the 10-day period, the reduction in body mass of *T. scripta* amounted to 19-32%, and the plasma osmolality increased from 275 to 402 mosmol l<sup>-1</sup> (Peterson and Greenshields, 2001). The hatchlings of the leatherback sea turtle, *Dermochelys coriacea*, also dehydrated rapidly when denied access to seawater; the hematocrit increased significantly from 30 ± 1% to 39 ± 1% and the plasma Na<sup>+</sup> increased significantly from 138 ± 3 to 166 ± 11 mmol l<sup>-1</sup> within a 12-h period (Reina et al., 2002). In contrast, *P. sinensis* exhibited only a slight change (2-2.3%) in the body mass after 3 or 6 days of terrestrial exposure. Thus, it was not surprising that 6 days of terrestrial exposure had no significant effects on its hematocrit and plasma osmolality, [Na<sup>+</sup>] and [Cl<sup>-</sup>]. Taken together, these results indicate that *P. sinensis* can regulate water loss during terrestrial exposure and is well-adapted to emersion in its natural habitat.

### *Decreases in urine production and urea excretion during emersion*

Some reptiles exhibit special adaptations to minimize water loss during emersion. When *T. scripta* is exposed to terrestrial conditions, dehydration decreases glomerular filtration rate and increases tubular reabsorption of water, causing anuria in more severe cases (Dantzler and Schmidt-Nielsen, 1966). Anuria also occurs in *Chelodina longicollis* after 20 days of dehydration, during which the volume of urine in the bladder of *C. longicollis* decreases from a mean of 32 to 2 ml, showing that water is reabsorbed from the bladder

(Rogers, 1965). In the case of *P. sinensis*, the daily rate of urine excretion decreased from 7-15 ml day<sup>-1</sup> (control) to 2-3 ml day<sup>-1</sup> during 5 days of emersion. By day 6, 5 out of the 6 experimental animals exhibited anuria.

During 6 days of emersion, there was a significant decrease in daily rates of nitrogenous waste (ammonia-N + urea-N) excretion. As hypothesized, the magnitude of decrease in the rate of urea excretion was much greater than that of ammonia excretion throughout the 6-day period. This could be due to two factors acting separately or in combination. Firstly, urea synthesis through the hepatic OUC was suppressed during emersion. Secondly, different routes were involved in ammonia and urea excretion, and emersion hindered urea excretion more than ammonia excretion. Since urea was excreted mainly through the buccopharyngeal cavity (Ip et al., 2012) and since water was not available to flush the buccopharyngeal epithelium during emersion, urea excretion was logically impeded to a greater extent than ammonia.

#### ***An explanation for the apparent change from ureotely to ammonotely during emersion***

Although the urea excretion rate decreased drastically to 1.5-18.2% of the control value, the ammonia concentration in the urine remained relatively unchanged and the ammonia excretion rate decreased by 34-77% in *P. sinensis* during 6 days of exposure to terrestrial conditions. Consequently, there was an apparent shift from ureotely during immersion to ammonotely during emersion in. It is probable that the reduction in ammonia excretion through the urine and buccopharyngeal route during emersion was partially compensated for by an increase in ammonia excretion through the skin of the ventral carapace which was in constant contact with water. The compensation was gradual and took 2-3 days, indicating that the transition between the renal route and the cutaneous route could be time-dependent (Fig. 1). Indeed, the skin of soft-shelled turtles is known to be permeable to respiratory gases (Girgis, 1961; Wang et al., 1989) and therefore it is logical that it also constitutes an appropriate route for ammonia (NH<sub>3</sub>) excretion. By contrast, urea transport is

known to be facilitated by UT, and the putative UT-A2 obtained from the buccopharyngeal cavity of *P. sinensis* is apparently not expressed in the skin (Y. K. Ip, unpublished results).

### ***Decrease in urea synthesis during emersion***

Six days of emersion led to significant increases in urea contents in all tissues and organs studied. However, the excess urea-N accumulated in a 300 g turtle was only ~414  $\mu\text{mol N}$  on day 3 and ~432  $\mu\text{mol N}$  on day 6, while the respective decreases in urea-N excretion amounted to ~1894 and ~3364  $\mu\text{mol N}$  (Table 6). If urea had been produced at a constant rate, a proportional amount of urea should theoretically be accumulated in the turtle. Since the excess urea accumulated could only account for 22% and 13% of the deficit in urea excretion on day 3 and day 6, respectively, it is logical to deduce that there was a decrease in the rate of urea synthesis in *P. sinensis* during 6 days of emersion.

The urea production rate of *P. sinensis* immersed in freshwater can be estimated as 2.1  $\mu\text{mol N day}^{-1} \text{g}^{-1}$  from the urea excretion rate, because tissue urea contents are maintained at steady states by a balance between urea production and urea excretion during immersion. On day 6 of emersion, the averaged daily urea production rate for a 300 g turtle (Table 6) can be calculated from the urea excreted during the 6-day period (366  $\mu\text{mol N}$ ) and excess urea accumulated in various tissues on day 6, i.e., (366 + 298 + 29 + 87)  $\mu\text{mol N}$  / (6 days x 300 g), or 0.43  $\mu\text{mol N day}^{-1} \text{g}^{-1}$ . That means the averaged daily urea production rate decreased by [(2.1-0.43)/2.1] x 100=79.5% during 6 days of emersion.

Judging by enzyme activities determined in the presence of saturating concentrations of substrates, which were close to  $V_{max}$  levels, both CPS I and ASS + ASL could be rate-limiting in the hepatic OUC in *P. sinensis*. The decreases in ASS + ASL (by 40%) and arginase (by 30%) activities supports the proposition that there was a decrease in the rate of urea synthesis during emersion. Thus, the general notion that increased urea synthesis would occur to ameliorate ammonia toxicity in aquatic animals during emersion is not applicable to



*P. sinensis*. Between increased urea synthesis and decreased ammonia production, the latter would appear to be much more effective for animals that remain quiescent during air exposure.

### ***Possible decrease in ammonia production during emersion***

CPS I utilizes ammonia as one of the substrates to produce urea. Hence, there should be increases in ammonia contents in various tissues and organs, if decreased urea synthesis occurred concurrently with an unchanged or decreased rate of ammonia excretion during emersion. However, significant increases in ammonia contents were observed only in the plasma and brain on day 6, and the accumulated ammonia was inadequate to account for the decrease in urea synthesis. Therefore, it can be deduced that there was also a reduction in ammonia production (~88%; Table 6), which occurred mainly through amino acid catabolism under fasting conditions. Since contents of TFAA and TEFAA remained unchanged in various tissues and organs, it is logical to deduce that the release of amino acid through proteolysis was also proportionally reduced in *P. sinensis* during emersion. It is probable that decreased urea synthesis and ammonia production could contribute to an overall reduction in metabolic activities in response to terrestrial exposure. However, our results indicate that partial catabolism of certain amino acids to alanine (Ip et al., 2001a; Chew et al., 2001, 2003a) was not involved in reducing ammonia production in *P. sinensis*, because there was no accumulation of alanine during emersion. While 6 days of emersion did not result in extraordinary increases in glutamine synthesis in extra-cranial tissues in *P. sinensis* as in some tropical air-breathing fishes exposed to air (Jow et al., 1999; Ip et al., 2001b; Chew et al., 2001; Tay et al., 2003), its brain was capable of detoxifying ammonia to glutamine as in many other vertebrates (Cooper and Plum 1987; Peng et al., 1998; Ip et al., 2005a).

### ***Conclusion***

During 6 days of emersion, *P. sinensis* reduced water loss through a reduction in urine production, which in part resulted in no change in hematocrit and plasma osmolality,  $[\text{Na}^+]$  and  $[\text{Cl}^-]$ . Despite a decrease in urine production, *P. sinensis* was able to maintain ammonia excretion rates at 23-66% of the immersed control. However, urea excretion was drastically reduced. Although tissue urea contents increased significantly, the rate of urea synthesis decreased with significant decreases in activities of certain hepatic OUC enzymes. An analysis of the decrease in nitrogenous excretion and the increase in nitrogenous accumulation reveals that 6 days of emersion resulted in a drastic suppression in ammonia production. Since the decrease in urea synthesis occurred without accumulations of ammonia, TFAA or TEFAA, it can be deduced that suppression in ammonia production was achieved through decreases in amino acid catabolism and protein degradation. In summary, *P. sinensis* adopted reduction in ammonia production, instead of increased urea synthesis, as the major strategy to ameliorate ammonia toxicity and water loss during terrestrial exposure.

## **FUNDING**

This study was supported in part by the Singapore Ministry of Education through a grant [R154-000-470-112] to Y.K.I.

## References

- Bentley, P. J.** (1976). Osmoregulation. In *Biology of the Reptilia*. Volume 5A (ed. Carl Gans), pp 365-412. London: Academic Press.
- Bentley, P. J. and Schmidt-Nielsen, K.** (1970). Comparison of water exchange in two aquatic turtles, *Trionyx spinifer* and *Pseudemys scripta*. *Comp. Biochem. Physiol.* **32**, 363-365
- Bergmeyer, H. U. and Beutler, H. O.** (1985). Ammonia. In *Methods of Enzymatic Analysis*, vol. VIII (ed. H.U. Bergmeyer, J. Bergmeyer and M. Graßl), pp. 454-461. New York: Academic Press.
- Campbell, J. W.** (1973). Nitrogen excretion. In *Comparative Animal Physiology, Third edition* (ed. C.L. Prosser), pp. 279-316. Philadelphia: Saunders College Publishing.
- Campbell, J. W.** (1991). Excretory nitrogen metabolism. In *Comparative Animal Physiology, vol. 1 Environmental and Metabolic Physiology* (ed. C.L. Prosser), pp. 277-324. New York: Wiley-Liss,
- Campbell, J. W.** (1995). Excretory nitrogen metabolism in reptiles and birds. In *Nitrogen Metabolism and Excretion* (ed. P.J. Walsh and P.A. Wright), pp. 147-178. Boca Raton, FL: CRC Press.
- Chew, S. F., Jin, Y. and Ip, Y. K.** (2001). The loach *Misgurnus anguillicaudatus* reduces amino acid catabolism and accumulates alanine and glutamine during aerial exposure. *Physiol. Biochem. Zool.* **74**, 226-237.
- Chew, S. F., Wong, M. Y., Tam, W. L., Loong, A. M. and Ip, Y. K.** (2003a). The snakehead *Channa asiatica* accumulates alanine during aerial exposure, but is incapable of sustaining locomotory activities on land through partial amino acid catabolism. *J. Exp. Biol.* **206**, 693-704.
- Chew, S. F., Ong, T. F., Ho, L., Tam, W. L., Loong, A. M., Hiong, K. C., Wong, W. P. and Ip, Y. K.** (2003b). Urea synthesis in the African lungfish *Protopterus dolloi*:

hepatic carbamoyl phosphate synthetase III and glutamine synthetase are upregulated by 6 days of aerial exposure. *J. Exp. Biol.* **206**, 3615-3624.

**Chew, S. F., Chan, N. K. Y., Tam, W. L., Loong, A. M., Hiong, K. C. and Ip, Y. K.**

(2004) Nitrogen metabolism in the African lungfish, *Protopterus dolloi*, aestivating in a mucus cocoon on land. *J. Exp. Biol.* **207**, 777-786.

**Chew, S. F., Wilson, J. M., Ip, Y. K. and Randall, D. J.** (2005). Nitrogen excretion and defense against ammonia toxicity. In *Fish Physiology Vol. 21* (ed. A.L. Val, V.M.F. Almeida-Val and D.J. Randall), pp 307-395. London: Academic Press.

**Cooper, J. L. and Plum, F.** (1987) Biochemistry and physiology of brain ammonia. *Physiol. Rev.* **67**, 440-519.

**Dantzler, W. H. and Schmidt-Nielsen, K.** (1966). Excretion in fresh-water turtle (*Pseudemys scripta*) and desert tortoise (*Gopherus agassizii*). *Am. J. Physiol.* **210**, 198-210.

**Faupel, R. P., Seitz, H. J., Tarnowski, W., Thiemann, V. and Weiss, C. H.** (1972). The problem of tissue sampling from experimental animals with respect to freeze technique, anoxia, stress and narcosis. *Arch. Biochem. Biophys.* **148**, 509-522.

**Girgis, S.** (1961). Aquatic respiration in the common Nile turtle, *Trionyx triunguis* (Forskål). *Comp. Biochem. Physiol.* **3**, 206-217.

**Ip, Y. K., Chew, S. F. and Randall, D. J.** (2001a). Ammonia toxicity, tolerance and excretion. In *Fish Physiology Vol. 20* (ed. P.A. Wright and P.M. Anderson), pp 109-148. San Diego: Academic Press.

**Ip, Y. K., Chew, S. F., Leong, I. A., Jin, Y., Lim, C. B. and Wu, R. S.** (2001b). The sleeper *Bostrichthys sinensis* (family Eleotridae) stores glutamine and reduces ammonia production during aerial exposure. *J. Comp. Physiol.* **171**, 357-367.

**Ip, Y. K., Chew, S. F. and Randall, D. J.** (2004) Five tropical fishes, six different strategies to defend against ammonia toxicity on land. *Physiol. Biochem. Zool.* **77**, 768-782

- Ip, Y. K., Lee, C. Y., Chew, S. F., Low, W. P. and Peng, K. W.** (1993). Differences in the responses of two mudskippers to terrestrial exposure. *Zool. Sci.* **10**, 511-519.
- Ip, Y. K., Leong, M. W. F., Sim, M. Y., Goh, G. S., Wong, W. P and Chew, S. F.** (2005a). Chronic and acute ammonia toxicity in mudskippers, *Periophthalmodon schlosseri* and *Boleophthalmus boddarti*: brain ammonia and glutamine contents, and effects of methionine sulfoximine and MK801. *J. Exp. Zool.* **208A**, 1993-2004.
- Ip, Y. K., Lim, C. B., Chew, S. F., Wilson, J. M. and Randall, D. J.** (2001c). Partial amino acid catabolism leading to the formation of alanine in *Periophthalmodon schlosseri* (mudskipper): a strategy that facilitates the use of amino acids as an energy source during locomotory activity on land. *J. Exp. Biol.* **204**, 1615-1624.
- Ip, Y. K., Loong, A. M., Lee, S. L. M., Ong, J. L. Y., Wong, W. P and Chew, S. F.** (2012). The Chinese soft-shelled turtle, *Pelodiscus sinensis*, excretes urea mainly through the mouth instead of the kidney. *J. Exp. Biol.* In press.
- Ip, Y. K., Peh, B. K., Tam, W. L., Lee, S. L. M. and Chew, S. F.** (2005b). Changes in salinity and ionic compositions can act as environmental signals to induce a reduction in ammonia production in the African lungfish *Protopterus dolloi*. *J. Exp. Zool.* **303A**, 456-463.
- Ip, Y. K., Yeo, P. J., Loong, A. M., Hiong, K. C., Wong, W. P. and Chew, S. F.** (2005c). The interplay of increased urea synthesis and reduced ammonia production in the African lungfish *Protopterus aethiopicus* during 46 days of aestivation in a mucus cocoon. *J. Exp. Zool.* **303**, 1054-1065.
- Jow, L. Y., Chew, S. F., Lim, C. B., Anderson, P. M. and Ip, Y. K.** (1999). The marble goby *Oxyeleotris marmoratus* activates hepatic glutamine synthetase and detoxifies ammonia to glutamine during air exposure. *J. Exp. Biol.* **202**, 237-245.

- Koops, J., Klomp, H. and Elgersma, R. H. C.** (1975). Rapid-determination of nitrogen in milk and dairy-products by colorimetric estimation of ammonia following an accelerated digestion procedure. *Netherlands Milk Dairy J.* **29**, 169-180.
- Lee, S. M. L., Wong, W. P., Hiong, K. C., Loong, A. M., Chew, S. F. and Ip, Y. K.** (2006). Nitrogen metabolism and excretion in the Chinese soft-shelled turtle, *Pelodiscus sinensis* exposed to a progressive increase in salinity. *J. Exp. Zool.* **305A**, 995–1009.
- Lee, S. M. L., Wong, W. P., Loong, A. M., Hiong, K. C., Chew, S. F. and Ip, Y. K.** (2007). Postprandial increases in nitrogenous excretion and urea synthesis in the Chinese soft-shelled turtle, *Pelodiscus sinensis* exposed to a progressive increase in ambient salinity. *J. Comp. Physiol. B.* **177**, 19–29.
- Lim, C. B., Chew, S. F., Anderson, P. M. and Ip, Y. K.** (2001). Reduction in the rates of protein and amino acid catabolism to slow down the accumulation of endogenous ammonia: a strategy potentially adopted by mudskippers (*Periophthalmodon schlosseri* and *Boleophthalmus boddarta*) during aerial exposure in constant darkness. *J. Exp. Biol.* **204**, 1605-1614.
- Loong, A. M., Hiong, K. C., Lee, S. M. L., Wong, W. P., Chew, S. F. and Ip, Y. K.** (2005). Ornithine-urea cycle and urea synthesis in African lungfishes, *Protopterus aethiopicus* and *Protopterus annectens*, exposed to terrestrial conditions for 6 days. *J. Exp. Zool.* **303A**, 354-365.
- Minnich, J. E.** (1979). Reptiles. In *Comparative Physiology of Osmoregulation in Animals*. (ed. G.M.O Maloiy) pp. 391-641. London: Academic Press.
- Peng, K. W., Chew, S. F., Lim, C. B., Kuah, S. S. L., Kok, W. K. and Ip, Y. K.** (1998). The mudskipper *Periophthalmodon schlosseri* and *Boleophthalmus boddarta* can tolerate 446 and 36  $\mu\text{M}$  of environmental  $\text{NH}_3$ , respectively. *Fish Physiol. Biochem.* **19**, 59-69.

- Peterson, C. H. and Greenshields, D.** (2001). Negative test for cloacal drinking in a semi-aquatic turtle (*Trachemys scripta*), with comments on the functions of cloacal bursae. *J. Exp. Zool.* **290A**, 247-254.
- Reina, R. D., Jones, T. T. and Spotila, J. R.** (2002). Salt and water regulation by the leatherback sea turtle *Dermochelys coriacea*. *J. Exp. Biol.* **205**, 1853-1860.
- Rogers, L. J.** (1966). The nitrogen excretion of *Chelodina longicollis* under conditions of hydration and dehydration. *Comp. Biochem. Physiol.* **18**, 249-260.
- Shoemaker, V. H. and Nagy, K. A.** (1977). Osmoregulation in amphibians and reptiles. *Ann. Rev. Physiol.* **39**, 449-471.
- Tay, A. S. L., Chew, S. F., and Ip, Y. K.** (2003). The swamp eel *Monopterus albus* reduces endogenous ammonia production and detoxifies ammonia to glutamine during 144 h of aerial exposure. *J. Exp. Biol.* **206**, 2427-2486.
- Walsh, P. J., Wood, C. M., Loong, A. M., Hiong, K. C., Lee, S. M. L., Wong, W. P., Chew, S. F. and Ip, Y. K.** (2004). Nitrogen metabolism and excretion in *Allenbatrachus grunniens* (L): effects of variable salinity, confinement, high pH and ammonia loading. *J. Fish Biol.* **65**, 1392-1411.
- Wang, Z. X., Sun, N. Z. and Sheng, W. F.** (1989). Aquatic respiration in soft-shelled turtles, *Trionyx sinensis*. *Comp. Biochem. Physiol.* **92A**, 593-598.



## Legends to figures

Fig. 1. The rates of excretion ( $\mu\text{mol N day}^{-1} \text{ g}^{-1}$  turtle) of ammonia (A) and urea (B), and the percentage of total-N excreted as urea-N (C) by *Pelodiscus sinensis* during 6 days of emersion, whereby turtles could urinate into the container at liberty. White bars represent immersed controls. Black bars represent turtles exposed to terrestrial conditions. Values are means  $\pm$  S.E.M. ( $N=4$ ). \*Significantly different from the corresponding control value,  $P<0.05$ . Means not sharing the same letter are significantly different,  $P<0.05$ .

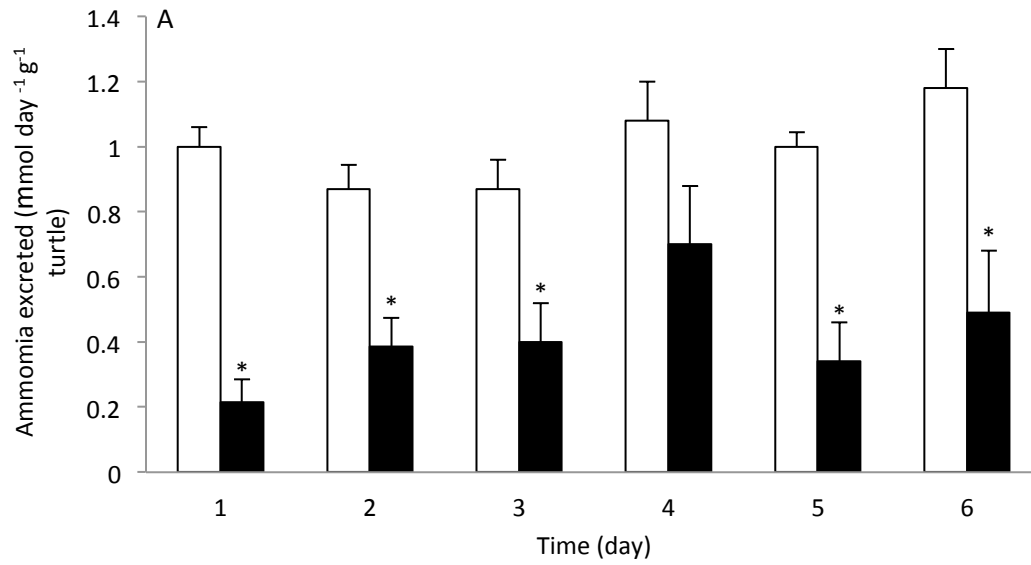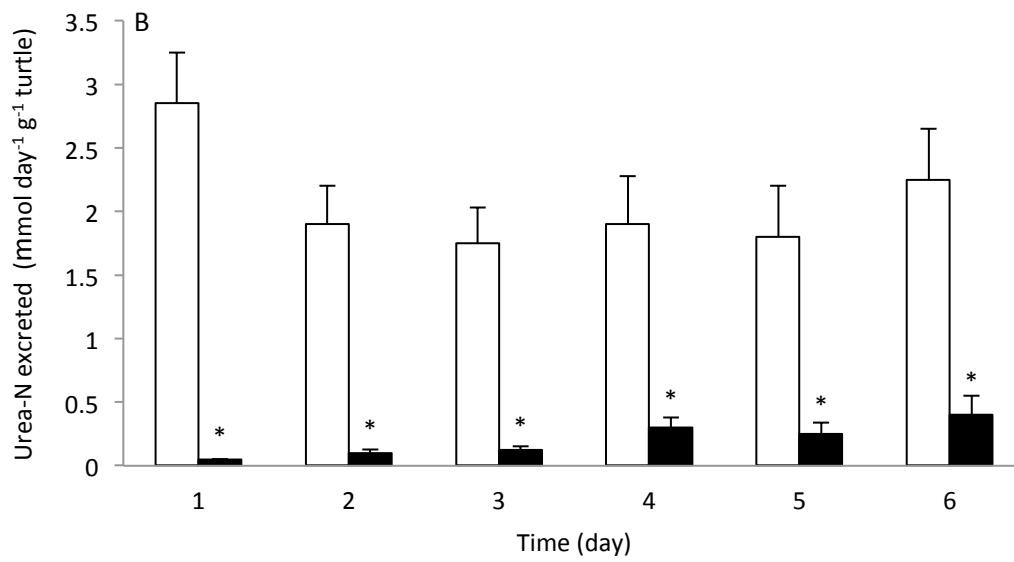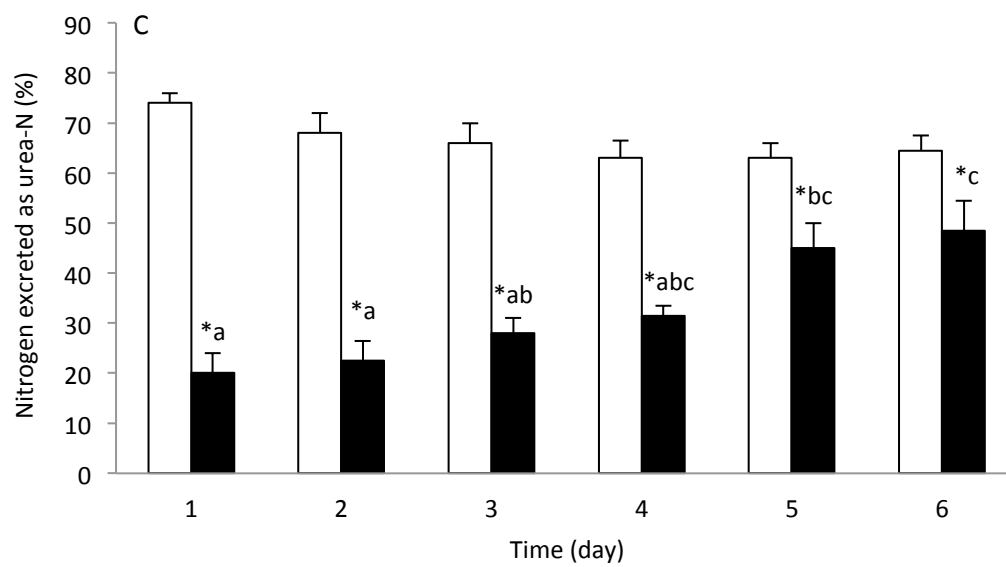

Table 1. Rates ( $\mu\text{mol N day}^{-1} \text{ g}^{-1}$  turtle) of renal or extra-renal ammonia excretion, and the percentage of ammonia-N excreted through the renal route, in *Pelodiscus sinensis* during 6 days of immersion (control) or emersion, with the urine being collected into a flexible latex tubing attached to the tail.

| Day | Control                   |               |                                     | Emersion                  |                      |                                     |
|-----|---------------------------|---------------|-------------------------------------|---------------------------|----------------------|-------------------------------------|
|     | Rate of ammonia excretion |               | % ammonia-N through the renal route | Rate of ammonia excretion |                      | % ammonia-N through the renal route |
|     | Extra-renal               | Renal         |                                     | Extra-renal               | Renal                |                                     |
| 1   | 0.21±0.06 (4)             | 0.26±0.09 (4) | 52±5 (4)                            | 0.057±0.011* (7)          | 0.18±0.10 (7)        | 46±16 (7)                           |
| 2   | 0.45±0.25 (4)             | 1.0±0.3 (4)   | 68±17 (4)                           | 0.070±0.028 (7)           | 0.12±0.05* (7)       | 40±15 (7)                           |
| 3   | 0.23±0.04 (4)             | 0.65±0.60 (4) | 31±22 (4)                           | 0.068±0.015* (7)          | 0.41±0.11 (7)        | 81±8 (7)                            |
| 4   | 0.17±0.03 (4)             | 0.75±0.25 (4) | 80±3 (4)                            | 0.19±0.08 (7)             | 0.19±0.08* (7)       | 34±12 (7)                           |
| 5   | 0.34±0.05 (4)             | 0.36±0.12 (4) | 48±12 (4)                           | 0.16±0.05 (5)             | 0.22±0.11 (5)        | 43±15 (5)                           |
| 6   | 0.36±0.11 (4)             | 0.78±0.32 (4) | 63±12 (4)                           | 0.024±0.011* (6)          | 1.3 (1) <sup>#</sup> | 98 (1) <sup>#</sup>                 |

Values represent means  $\pm$  s.e.m.; with number of determinations represented in parentheses.

\*Significantly different from the corresponding control condition

<sup>#</sup>Total N= 6, but no urine production in 5 out of the 6 turtles

Table 2. Rates ( $\mu\text{mol N day}^{-1} \text{g}^{-1}$  turtle) of renal or extra-renal urea excretion, and the percentage of urea-N excreted through the renal route, in *Pelodiscus sinensis* during 6 days of immersion (control) or emersion, with the urine being collected into a flexible latex tubing attached to the tail.

| Day | Control                |                   |                                  | Emersion               |                         |                                  |
|-----|------------------------|-------------------|----------------------------------|------------------------|-------------------------|----------------------------------|
|     | Rate of urea excretion |                   | % urea-N through the renal route | Rate of urea excretion |                         | % urea-N through the renal route |
|     | Extra-renal            | Renal             |                                  | Extra-renal            | Renal                   |                                  |
| 1   | 1.2±0.2 (4)            | 0.19±0.12 (4)     | 11±6 (4)                         | 0.064±0.036* (7)       | 0.0030±0.0018 (7)       | 8.3±4.7 (7)                      |
| 2   | 0.80±0.20 (4)          | 0.0043±0.0026 (4) | 0.45±0.12 (4)                    | 0.062±0.046* (7)       | 0.076±0.047 (7)         | 27±14 (7)                        |
| 3   | 0.71±0.15 (4)          | 0.071±0.070 (4)   | 4.2±4.0 (4)                      | 0.042±0.023* (7)       | 0.18±0.08 (7)           | 49±18 (7)                        |
| 4   | 0.72±0.12 (4)          | 0.044±0.035 (4)   | 4.2±2.7 (4)                      | 0.058±0.035* (7)       | 0.076±0.041 (7)         | 38±16 (7)                        |
| 5   | 0.57±0.19 (4)          | 0.11±0.09 (4)     | 15±11 (4)                        | 0.14±0.07 (5)          | 0.14±0.06 (5)           | 49±21 (5)                        |
| 6   | 1.4±0.3 (4)            | 0.0074±0.0037 (4) | 0.65±0.37 (4)                    | 0.023±0.004* (6)       | 0.0030 (1) <sup>#</sup> | 15 (1) <sup>#</sup>              |

Values represent means  $\pm$  s.e.m.; with number of determinations represented in parentheses.

\*Significantly different from the corresponding control condition

<sup>#</sup>Total N= 6, but no urine production in 5 out of the 6 turtles

Table 3. Activities ( $\mu\text{mol min}^{-1} \text{g}^{-1}$  liver) of carbamoyl phosphate synthetase I (CPS I), ornithine transcarbamylase (OTC), argininosuccinate synthetase + lyase (ASS+ASL), arginase, glutamine synthetase (GS) and glutamate dehydrogenase (GDH) in the amination direction from the liver of *Pelodiscus sinensis* exposed to 3 or 6 days of immersion (control) or emersion.

|                                | Enzyme activity |           |           |            |
|--------------------------------|-----------------|-----------|-----------|------------|
|                                | Day 3           |           | Day 6     |            |
|                                | Control         | Emersion  | Control   | Emersion   |
| CPS I                          |                 |           |           |            |
| NH <sub>4</sub> Cl             | n.d.            | n.d.      | n.d.      | n.d.       |
| NH <sub>4</sub> Cl + AGA       | 0.45±0.05       | 0.56±0.04 | 0.26±0.04 | 0.25±0.04  |
| NH <sub>4</sub> Cl + AGA + UTP | 0.38±0.04       | 0.48±0.04 | 0.21±0.04 | 0.22±0.04  |
| OTC                            | 98±9            | 100±9     | 97±15     | 81±9       |
| ASS + ASL                      | 0.41±0.07       | 0.43±0.05 | 0.36±0.04 | 0.23±0.02* |
| Arginase                       | 171±12          | 205±14    | 208±5     | 149±12*    |
| GS                             | 1.7±0.7         | 1.2±0.2   | 1.0±0.2   | 0.96±0.16  |
| GDH                            | 90±7            | 87±11     | 85±34     | 77±15      |

Results represent means  $\pm$  s.e.m.;  $N=4$ .

\*Significantly different from the corresponding control condition

AGA, N-acetyl-L-glutamate; UTP, uridine triphosphate; n.d., not detectable.

Table 4. Ammonia and urea contents ( $\mu\text{mol g}^{-1}$  tissue) in various tissues of *Pelodiscus sinensis* exposed to 3 or 6 days of immersion (control) or emersion.

|        | Ammonia content |           |           |            | Urea content |          |         |          |
|--------|-----------------|-----------|-----------|------------|--------------|----------|---------|----------|
|        | Day 3           |           | Day 6     |            | Day 3        |          | Day 6   |          |
|        | Control         | Emersion  | Control   | Emersion   | Control      | Emersion | Control | Emersion |
| Brain  | 0.80±0.13       | 0.69±0.10 | 0.41±0.07 | 0.66±0.06* | 1.2±0.5      | 3.0±0.4* | 1.1±0.2 | 3.0±0.3* |
| Liver  | 3.0±0.6         | 1.6±0.2   | 1.3±0.2   | 1.6±0.2    | 1.3±0.4      | 3.0±0.4* | 1.2±0.3 | 2.8±0.3* |
| Muscle | 0.48±0.11       | 0.66±0.08 | 0.37±0.05 | 0.43±0.06  | 1.2±0.4      | 3.2±0.4* | 1.4±0.3 | 3.4±0.2* |
| Plasma | 0.37±0.05       | 0.46±0.01 | 0.32±0.05 | 0.44±0.03* | 1.2±0.4      | 3.5±0.4* | 1.4±0.3 | 4.3±0.5* |

Values represent means  $\pm$  s.e.m.,  $N=6$ .

\*Significantly different from the corresponding control condition

Table 5. Contents ( $\mu\text{mol g}^{-1}$  tissue) of free amino acids (FAAs), total FAA (TFAA) and total essential FAA (TEFAA) in the brain, liver, muscle and plasma of *Pelodiscus sinensis* exposed to 3 or 6 days of immersion (control) or emersion.

|               | FAA content |             |             |             |
|---------------|-------------|-------------|-------------|-------------|
|               | Day 3       |             | Day 6       |             |
|               | Control     | Emersion    | Control     | Emersion    |
| <b>Brain</b>  |             |             |             |             |
| Alanine       | 0.28±0.03   | 0.31±0.09   | 0.19±0.04   | 0.22±0.02   |
| Glutamate     | 4.8±0.9     | 5.7±0.4     | 4.8±0.5     | 5.8±0.3     |
| Glutamine     | 1.9±0.2     | 3.0±0.3*    | 1.5±0.2     | 3.1±0.6*    |
| TFAA          | 12±1        | 12±1        | 10±1        | 13±1        |
| TEFAA         | 0.91±0.13   | 0.62±0.04   | 0.68±0.03   | 0.51±0.02*  |
| <b>Liver</b>  |             |             |             |             |
| Alanine       | 0.14±0.03   | 0.090±0.036 | 0.084±0.017 | 0.055±0.008 |
| Glutamate     | 0.90±0.07   | 1.0±0.3     | 0.71±0.11   | 0.76±0.14   |
| Glutamine     | 0.25±0.13   | 1.0±0.7     | 0.096±0.052 | 0.070±0.013 |
| TFAA          | 10±1        | 9.2±1.6     | 8.3±1.1     | 7.6±1.6     |
| TEFAA         | 1.0±0.2     | 0.64±0.09   | 0.85±0.13   | 0.56±0.14   |
| <b>Muscle</b> |             |             |             |             |
| Alanine       | 0.24±0.04   | 0.27±0.02   | 0.23±0.04   | 0.22±0.02   |
| Glutamate     | 0.79±0.37   | 0.54±0.16   | 1.0±0.3     | 0.59±0.1    |
| Glutamine     | 0.66±0.09   | 0.94±0.14   | 0.50±0.1    | 0.81±0.16   |
| TFAA          | 12±2        | 11±1        | 11±1        | 10±1        |
| TEFAA         | 1.8±0.2     | 1.6±0.2     | 2.0±0.2     | 1.4±0.3     |
| <b>Plasma</b> |             |             |             |             |
| Alanine       | 0.083±0.031 | 0.087±0.013 | 0.095±0.020 | 0.068±0.008 |
| Glutamate     | 0.092±0.029 | 0.058±0.004 | 0.060±0.021 | 0.067±0.017 |
| Glutamine     | 0.13±0.04   | 0.15±0.03   | 0.11±0.02   | 0.13 ±0.03  |
| TFAA          | 2.0±0.7     | 1.6±0.3     | 2.2±0.4     | 1.7±0.3     |
| TEFAA         | 1.0±0.4     | 0.79±0.21   | 1.2±0.3     | 0.86±0.23   |

Values represent means  $\pm$  s.e.m.;  $N=4$ .

\*Significantly different from the corresponding control condition

Table 6. An estimate of the reduction in nitrogenous excretion ( $\mu\text{mol N}$ ) and the increase in nitrogenous accumulation ( $\mu\text{mol N}$ ) in a hypothetical 300 g *Pelodiscus sinensis*<sup>\*</sup>, taking into account the muscle, liver, and plasma, exposed to 3 or 6 days of immersion (control) or emersion.

|                                          | Day 3   |          |              | Day 6   |          |              |
|------------------------------------------|---------|----------|--------------|---------|----------|--------------|
|                                          | Control | Emersion | Difference   | Control | Emersion | Difference   |
| Excreted from <i>P. sinensis</i>         |         |          |              |         |          |              |
| Ammonia-N                                | 825     | 302      | -523         | 1795    | 764      | -1031        |
| Urea-N                                   | 1968    | 74       | -1894        | 3730    | 366      | -3364        |
| (A) Reduction in nitrogenous excretion   |         |          | <b>-2417</b> |         |          | <b>-4395</b> |
| Accumulated in muscle (74 g)             |         |          |              |         |          |              |
| Ammonia-N                                | 36      | 49       | +13          | 27      | 32       | +5           |
| Urea-N                                   | 179     | 474      | +295         | 208     | 506      | +298         |
| Accumulated in liver (9.4 g)             |         |          |              |         |          |              |
| Ammonia-N                                | 27      | 14       | -13          | 11      | 15       | +4           |
| Urea-N                                   | 24      | 54       | +30          | 21      | 50       | +29          |
| Accumulated in plasma (15 ml)            |         |          |              |         |          |              |
| Ammonia-N                                | 6       | 7        | +1           | 5       | 7        | +2           |
| Urea-N                                   | 37      | 106      | +69          | 43      | 130      | +87          |
| (B) Increase in nitrogenous accumulation |         |          | <b>+395</b>  |         |          | <b>+427</b>  |
| (A) + (B)                                |         |          | <b>-2022</b> |         |          | <b>-3968</b> |

<sup>\*</sup>The masses of the carapace and endoskeleton of a 300 g *P. sinensis* are 150 g and 67 g, respectively; hence, similar to animals without a carapace, the liver and muscle together would constitute ~56% of the body mass excluding the carapace but inclusive of the endoskeleton.



**Supplementary Table.** Daily rate (ml day<sup>-1</sup>) of urine (collected from a flexible latex tubing attached to the tail) excretion in *Pelodiscus sinensis* during 6 days of immersion (control) or emersion.

| Day | Control       | Emersion             |
|-----|---------------|----------------------|
| 1   | 11 ± 4 (4)    | 3.4 ± 1.6 (7)        |
| 2   | 16 ± 5 (4)    | 2.0 ± 0.9* (7)       |
| 3   | 8.1 ± 4.5 (4) | 2.9 ± 0.5 (7)        |
| 4   | 15 ± 2 (4)    | 2.1 ± 0.5* (7)       |
| 5   | 7.3 ± 1.9 (4) | 2.2 ± 0.4 (5)        |
| 6   | 15 ± 3 (4)    | 6.7 (1) <sup>#</sup> |

Values represent means ± s.e.m.; with number of determinations represented in parentheses.

\*Significantly different from the corresponding control condition

<sup>#</sup>Total N= 6, but no urine production in 5 out of the 6 turtles
